# Supplementary material
Source: PubMed Central journal article supplement (PMC4128346)
Supplement: NIHMS607489-supplement-02.pdf [file NIHMS607489-supplement-02.pdf]

**Table SI Number of cells belonging to each of six cell types in *Trichoplax***

| Cell Type          | Distinctive feature    | Cells/10 <sup>4</sup> μm <sup>2</sup> * | %    | Total #      |
|--------------------|------------------------|-----------------------------------------|------|--------------|
| Ventral epithelial | Ciliary pit            | 1845 ± 257<br>(3)                       | 72   | 36226        |
| Lipophil           | Fluorescent inclusions | 285 ± 52 (5)                            | 11   | 5596         |
| Dorsal epithelial  | Actin stain            | 236 ± 24 (5)                            | 9    | 4634         |
| Fiber              | TaDCH/P2X stain        | 113 ± 9 (6)                             | 4.4  | 2219         |
| Gland              | Secretory proteins     | 70 ± 10 (5)                             | 2.7  | 1374         |
| Crystal            | Crystal                | 3.8 ± 0.7 (5)                           | 0.15 | 75           |
|                    | Total number of cells  |                                         |      | <b>50124</b> |

\* In areal projection of the ventral surface; Mean ± SEM (number of individuals)

# Cell numbers extrapolated from densities to *Trichoplax* 0.5 mm in diameter
